# Supplementary material for: Cardiac Events Potentially Associated to Remdesivir: An Analysis from the European Spontaneous Adverse Event Reporting System
Source: MDPI journal article supplement (doi:10.3390/ph14070611), 2021-06-25
Supplement: s1 [file s1]

# Cardiac Events Potentially Associated to Remdesivir: An Analysis from the European Spontaneous Adverse Event Reporting System

Concetta Rafaniello <sup>1,\*,†</sup>, Carmen Ferrajolo <sup>1,‡</sup>, Maria Giuseppa Sullo <sup>1</sup>, Mario Gaio <sup>1</sup>, Alessia Zinzi <sup>1</sup>, Cristina Scavone <sup>1</sup>, Francesca Gargano <sup>2</sup>, Enrico Coscioni <sup>3</sup>, Francesco Rossi <sup>1,‡</sup> and Annalisa Capuano <sup>1,‡</sup>

<sup>1</sup> Campania Regional Centre for Pharmacovigilance and Pharmacoepidemiology—Department of Experimental Medicine—Section of Pharmacology “L. Donatelli”, University of Campania “Luigi Vanvitelli”, Via Costantinopoli, 16, 80138 Naples, Italy; carmen.ferrajolo@unicampania.it (C.F.); pina.sullo@libero.it (M.G.S.); mario.gαιο@unicampania.it (M.G.); alessia.zinzi@unicampania.it (A.Z.); cristina.scavone@unicampania.it (C.S.); francesco.rossi@unicampania.it (F.R.); annalisa.capuano@unicampania.it (A.C.)

<sup>2</sup> Department of Anesthesia and Resuscitation, Biomedical Campus University of Rome, 00128 Rome, Italy; f.gargano@unicampus.it

<sup>3</sup> AGENAS—Agenzia Nazionale per i Servizi Sanitari Regionali, via Piemonte 60, 00187 Roma, Italy; coscionienrico@gmail.com

\* Correspondence: concetta.rafaniello@unicampania.it; Tel. +39-81-5665805

† These authors contributed equally to this work.

‡ These authors are both lead authors.

**Supplementary Table S1:** Description of type of cardiac events by preferred terms MedDRA.

| Preferred Term (MedDRA)                 | Number of events |
|-----------------------------------------|------------------|
| Bradycardia                             | 69               |
| Cardiac arrest                          | 52               |
| Atrial fibrillation                     | 20               |
| Pulseless electrical activity           | 18               |
| Sinus bradycardia                       | 16               |
| Acute myocardial infarction             | 13               |
| Cardio-respiratory arrest               | 13               |
| Tachycardia                             | 9                |
| Electrocardiogram QT prolonged          | 6                |
| Ventricular tachycardia                 | 6                |
| Blood pressure decreased                | 5                |
| Heart rate increased                    | 4                |
| Supraventricular tachycardia            | 4                |
| Cardiac failure                         | 4                |
| Arrhythmia supraventricular             | 3                |
| Arrhythmia                              | 3                |
| Heart rate decreased                    | 3                |
| Ventricular fibrillation                | 3                |
| Electrocardiogram QRS complex prolonged | 3                |
| Atrial flutter                          | 2                |
| Pulse absent                            | 2                |
| Electrocardiogram ST-T change           | 2                |
| Cardiovascular disorder                 | 2                |

|                                        |   |
|----------------------------------------|---|
| Myocardial infarction                  | 2 |
| Cardiogenic shock                      | 2 |
| Cardiopulmonary failure                | 2 |
| Ventricular extrasystoles              | 2 |
| Heart rate irregular                   | 1 |
| Electrocardiogram ST segment elevation | 1 |
| Blood pressure systolic decreased      | 1 |
| Atrioventricular block complete        | 1 |
| Bradyarrhythmia                        | 1 |
| Bundle branch block right              | 1 |
| Sinus node dysfunction                 | 1 |
| Myocarditis                            | 1 |
| Sinus tachycardia                      | 1 |
| Supraventricular extrasystoles         | 1 |
| Tachyarrhythmia                        | 1 |
| Tachycardia foetal                     | 1 |
| Cardiac disorder                       | 1 |
| Cardiac dysfunction                    | 1 |
| Myocardial ischaemia                   | 1 |
| Acute right ventricular failure        | 1 |
| Cardiomyopathy                         | 1 |
| Sinoatrial block                       | 1 |
